# Supplementary material for: Tuning the Polymorphism of the Anti-VEGF G-rich V7t1 Aptamer by Covalent Dimeric Constructs
Source: PubMed Central journal article supplement (PMC7139925; doi:10.3390/ijms21061963), 2020-03-13
Supplement: ijms-21-01963-s001.pdf [file ijms-21-01963-s001.pdf]

# Supplementary Material

## Tuning the Polymorphism of the Anti-VEGF G-rich V7t1 Aptamer by Covalent Dimeric Constructs

Claudia Riccardi <sup>1</sup>, Domenica Musumeci <sup>1,2</sup>, Chiara Platella <sup>1</sup>, Rosa Gaglione <sup>1</sup>, Angela Arciello <sup>1,3</sup> and Daniela Montesarchio <sup>1,\*</sup>

<sup>1</sup> Department of Chemical Sciences, University of Naples Federico II, Via Cintia 21, I-80126, Napoli, Italy; claudia.riccardi@unina.it (C.R.); domenica.musumeci@unina.it (D.Mu.); chiara.platella@unina.it (C.P.); rosa.gaglione@unina.it (R.G.); angela.arciello@unina.it (A.A.)

<sup>2</sup> Institute of Biostructures and Bioimages (IBB), CNR, Via Mezzocannone 16, I-80134 Napoli, Italy

<sup>3</sup> National Institute of Biostructures and Biosystems (INBB), 00136 Rome, Italy

\* Correspondence: daniela.montesarchio@unina.it

## Table of contents

|                                                                                                                                                        |                 |
|--------------------------------------------------------------------------------------------------------------------------------------------------------|-----------------|
| <b>Figure S1.</b> Schematic representation of the sequences of the covalent V7t1 dimers                                                                | <b>pag. S3</b>  |
| <b>Figure S2.</b> Molecular structure of the functionalized CPG-based solid supports and linker building blocks used for the oligonucleotide synthesis | <b>pag. S4</b>  |
| <b>Figure S3.</b> 20 % polyacrylamide denaturing gel electrophoresis analysis                                                                          | <b>pag. S5</b>  |
| <b>Figure S4.</b> 10 % polyacrylamide native gel electrophoresis analysis                                                                              | <b>pag. S6</b>  |
| <b>Figure S5.</b> 2 % agarose native gel analysis in amine-free buffers                                                                                | <b>pag. S7</b>  |
| <b>Figure S6.</b> Size exclusion HPLC analysis in HEPES/Na <sup>+</sup> buffer solution                                                                | <b>pag. S8</b>  |
| <b>Figure S7.</b> Size exclusion HPLC analysis in TRIS/K <sup>+</sup> buffer solution                                                                  | <b>pag. S9</b>  |
| <b>Figure S8.</b> TDS profiles in HEPES/Na <sup>+</sup> buffer solution                                                                                | <b>pag. S10</b> |
| <b>Figure S9.</b> TDS profiles in TRIS/K <sup>+</sup> buffer solution                                                                                  | <b>pag. S11</b> |
| <b>Figure S10.</b> UV analysis on <b>bisV7t1T7</b> at 260 nm                                                                                           | <b>pag. S12</b> |
| <b>Figure S11.</b> CD analysis on <b>bisV7t1T7</b> in HEPES/Na <sup>+</sup> buffer solution                                                            | <b>pag. S13</b> |
| <b>Figure S12.</b> CD analysis on <b>bisV7t1HEG2</b> in HEPES/Na <sup>+</sup> buffer solution                                                          | <b>pag. S14</b> |
| <b>Figure S13.</b> CD analysis on <b>bisV7t1TEG2D</b> in HEPES/Na <sup>+</sup> buffer solution                                                         | <b>pag. S15</b> |
| <b>Figure S14.</b> CD analysis in the selected TRIS/K <sup>+</sup> buffer solution                                                                     | <b>pag. S16</b> |
| <b>Table S1.</b> T <sub>m</sub> values obtained by CD-monitored thermal denaturation experiments                                                       | <b>pag. S17</b> |
| <b>Figure S15.</b> EMSA experiments with BSA                                                                                                           | <b>pag. S18</b> |

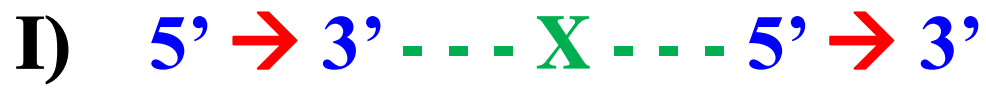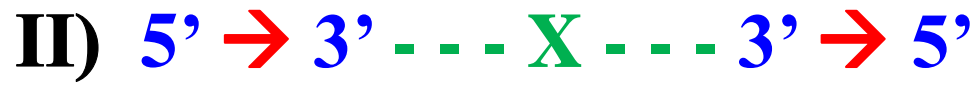

**Figure S1.** Polarity of the two strands in the V7t1 tandem sequences linked by a generic linker, indicated with ---X---. Scheme (I) represents the overall structure present in **bisV7t1T7** and **bisV7t1HEG2** in which both V7t1 strands have the 5'→3' direction, while Scheme (II) was exploited in **bisV7t1TEG2D** with an inversion of polarity site.

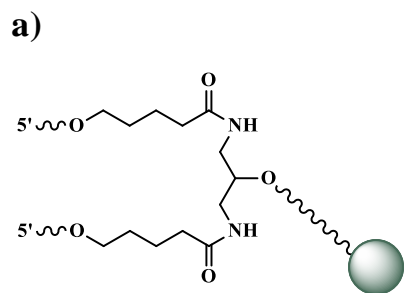

**CPG-<sup>3'</sup>symmetric doubler DNA**

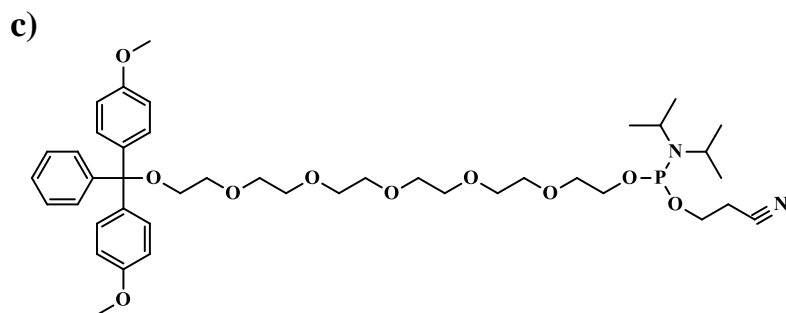

**Linker HEG phosphoramidite**

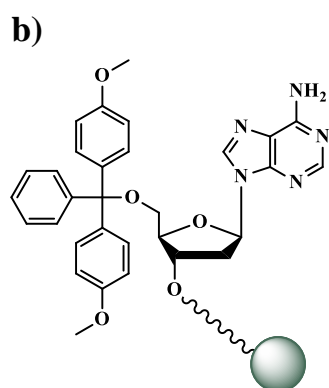

**CPG-<sup>3'</sup>dA<sup>5'</sup>DMT**

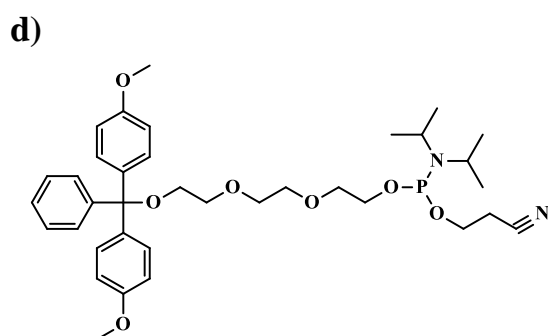

**Linker TEG phosphoramidite**

**Figure S2.** Molecular structure of the functionalized CPG-based solid supports and linker building blocks used for the oligonucleotide synthesis: (a) CPG-<sup>3'</sup>symmetric doubler DNA solid support for **bisV7t1TEG2D**; (b) CPG-<sup>3'</sup>dA<sup>5'</sup>DMT solid support for **bisV7t1T7** and **bisV7t1HEG2**; (c) HEG- and (d) TEG-based spacer-CE phosphoramidites, respectively used for **bisV7t1HEG2** and **bisV7t1TEG2D**.

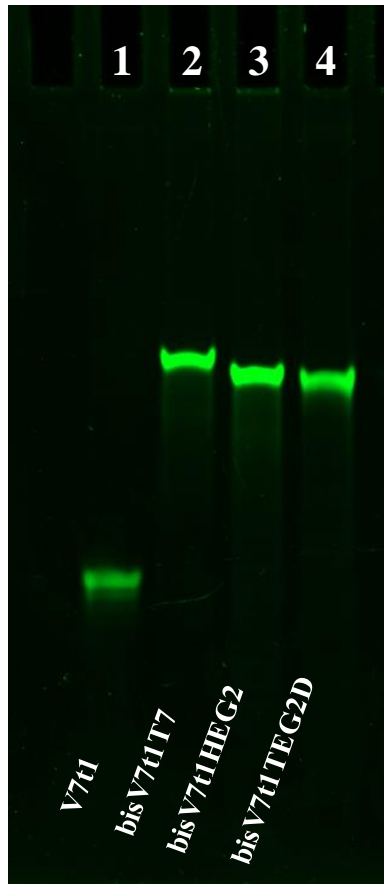

**Figure S3.** 20 % polyacrylamide denaturing gel electrophoresis (8 M urea) at 9  $\mu$ M sample concentration, run at constant 200 V at r.t. for 3.5 h in TBE 1X as running buffer. Lane 1: V7t1; lane 2: **bisV7t1T7**; lane 3: **bisV7t1HEG2**; lane 4: **bisV7t1TEG2D**.

a)

*HEPES/Na<sup>+</sup>*

Annealing

| -    |  | +     |  | -       |  | +        |  | - |  | + |  |
|------|--|-------|--|---------|--|----------|--|---|--|---|--|
| V7t1 |  | bisT7 |  | bisHEG2 |  | bisTEG2D |  | - |  | + |  |

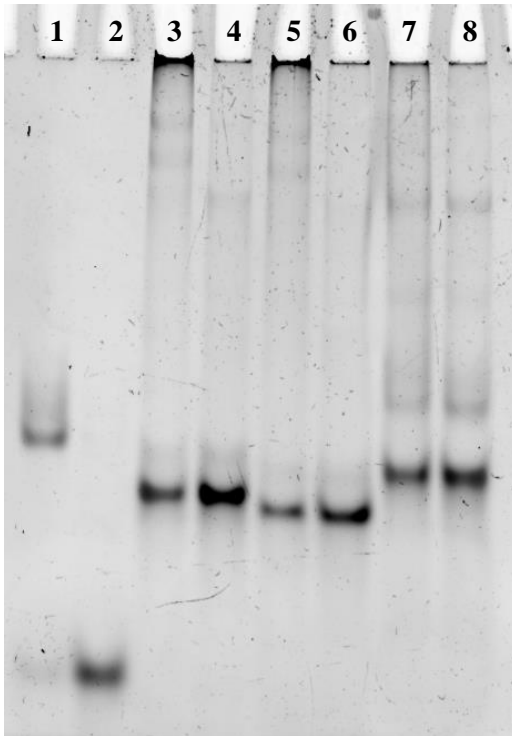

b)

*TRIS/K<sup>+</sup>*

| -    |  | +     |  | -       |  | +        |  | - |  | + |  |
|------|--|-------|--|---------|--|----------|--|---|--|---|--|
| V7t1 |  | bisT7 |  | bisHEG2 |  | bisTEG2D |  | - |  | + |  |

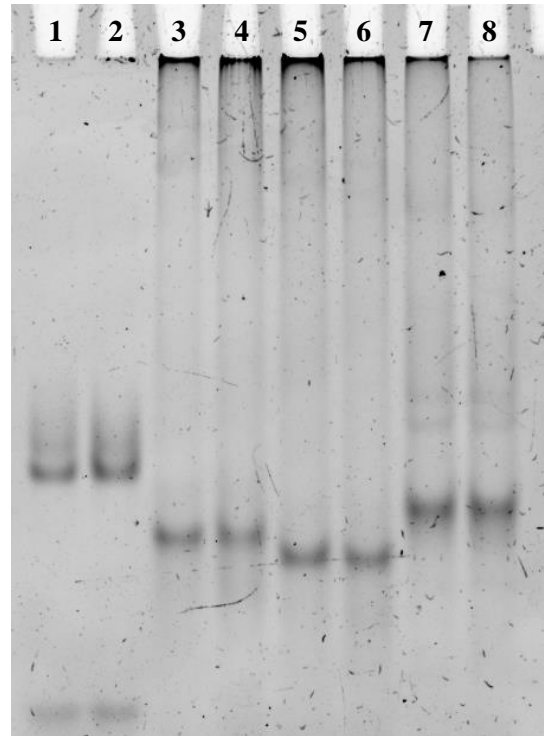

**Figure S4.** 10 % polyacrylamide gel electrophoresis under native conditions of V7t1 and its covalent dimers (here indicated for simplicity as bisT7, bisHEG2, bisTEG2D) in both N.A. (-) and A. (+) form at 4  $\mu$ M concentration in the selected HEPES/ Na<sup>+</sup> (**a**) and TRIS/K<sup>+</sup> (**b**) buffer solutions. Gels were run at constant 70 V at r.t. for 1.75 h (**a**) and 2 h (**b**) in TBE 1X as running buffer.

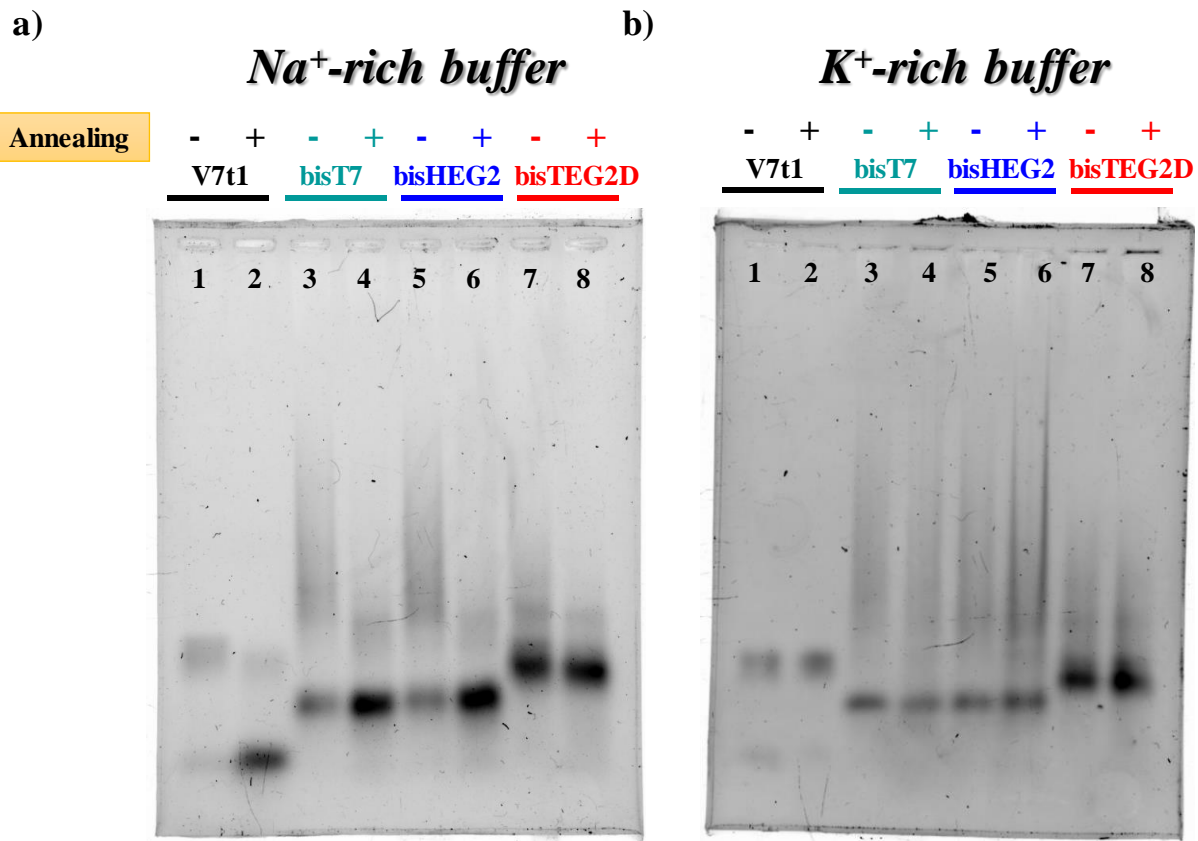

**Figure S5.** 2 % agarose gel electrophoresis under native conditions of V7t1 and its covalent dimeric analogues (here indicated as **bisT7**, **bisHEG2**, **bisTEG2D**) in both N.A. (-) and A. (+) form at 4  $\mu$ M concentration in the amine-free 150 mM NaCl (pH = 7.4), as Na<sup>+</sup>-rich buffer (a) and 100 mM KCl (pH = 7.3), as K<sup>+</sup>-rich buffer (b) buffer solutions. Gels were run at constant 60 V at r.t. for 2 h in TBE 1X as running buffer.

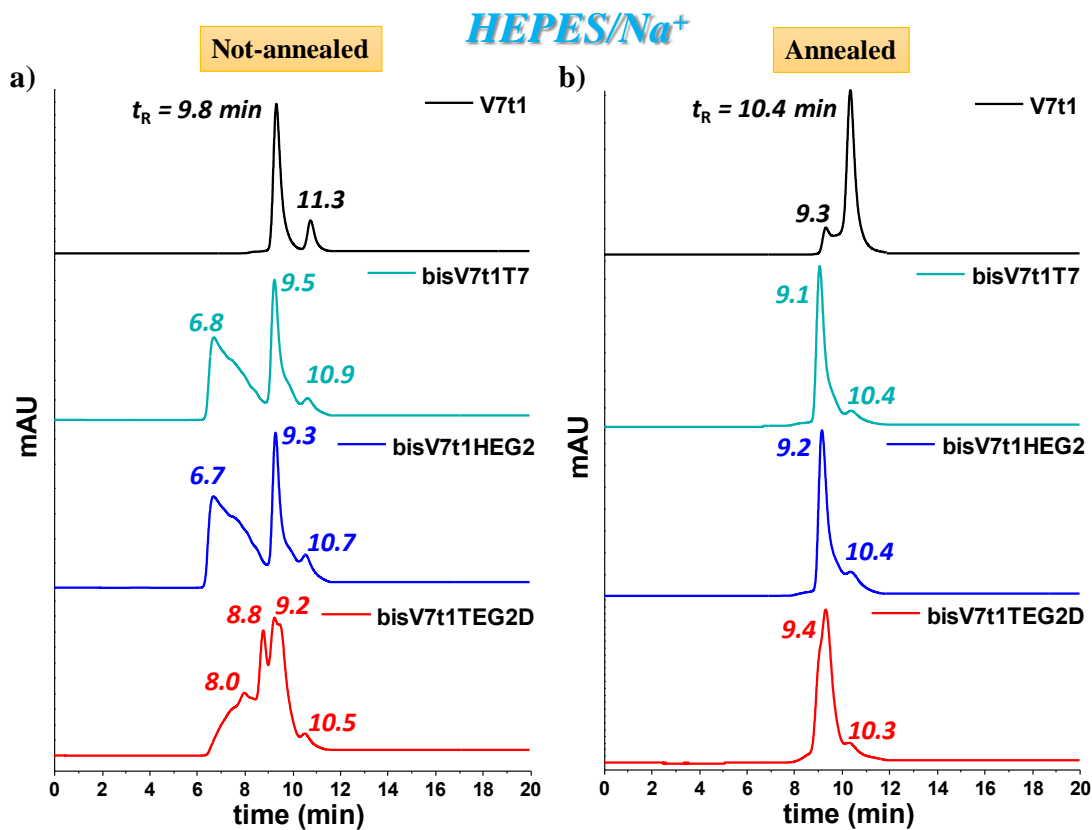

**Figure S6.** Size exclusion HPLC analysis of V7t1 (black line) and **bisV7t1T7**, **bisV7t1HEG2** and **bisV7t1TEG2D** (green, blue and red lines, respectively) in both N.A. (a) and A. (b) form in the selected HEPES/Na<sup>+</sup> buffer at 2  $\mu\text{M}$  concentration. On each peak, the observed retention time ( $t_R$ ) is also reported. The error associated with the  $t_R$  determination is within  $\pm 5 \%$ .



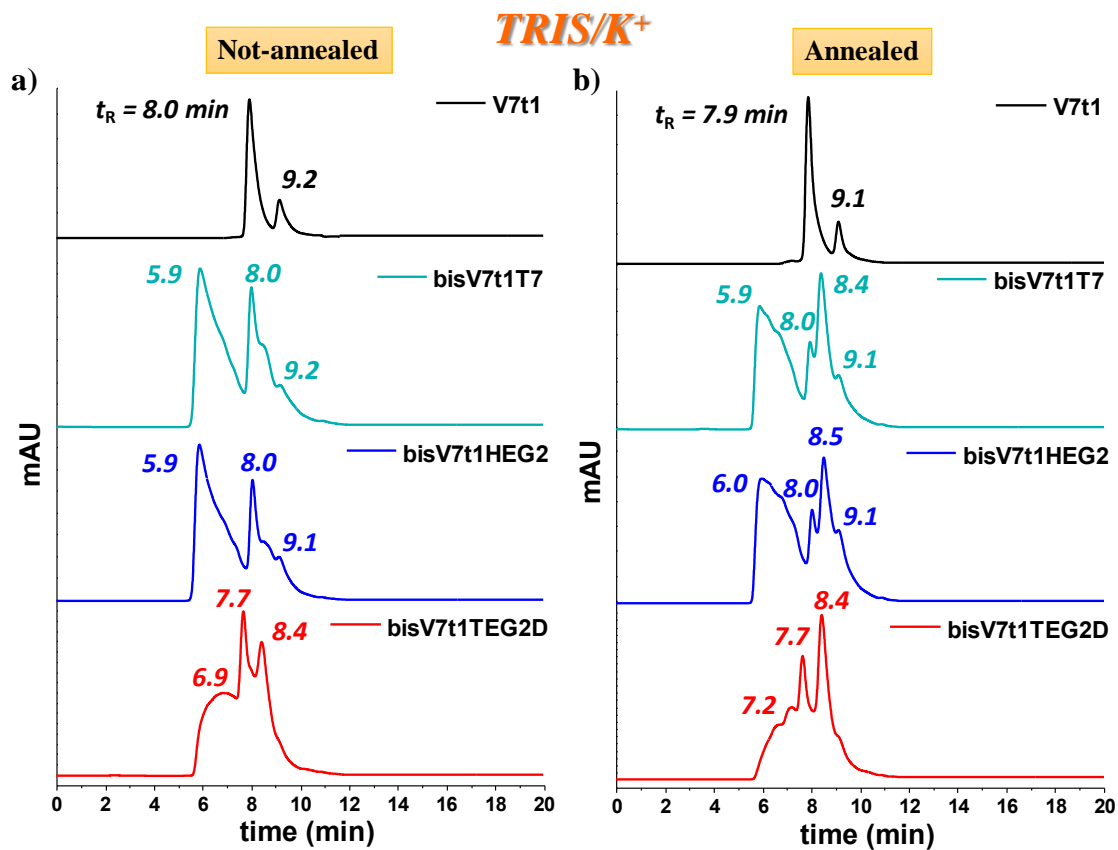

**Figure S7.** Size exclusion HPLC analysis of V7t1 (black line) and **bisV7t1T7**, **bisV7t1HEG2** and **bisV7t1TEG2D** (green, blue and red lines, respectively) in both N.A. (**a**) and A. (**b**) form in the selected TRIS/K<sup>+</sup> buffer at 2  $\mu\text{M}$  concentration. On each peak, the observed retention time ( $t_R$ ) is also reported. The error associated with the  $t_R$  determination is within  $\pm 5\%$ .

**HEPES/Na<sup>+</sup>**

**bisV7t1T7**

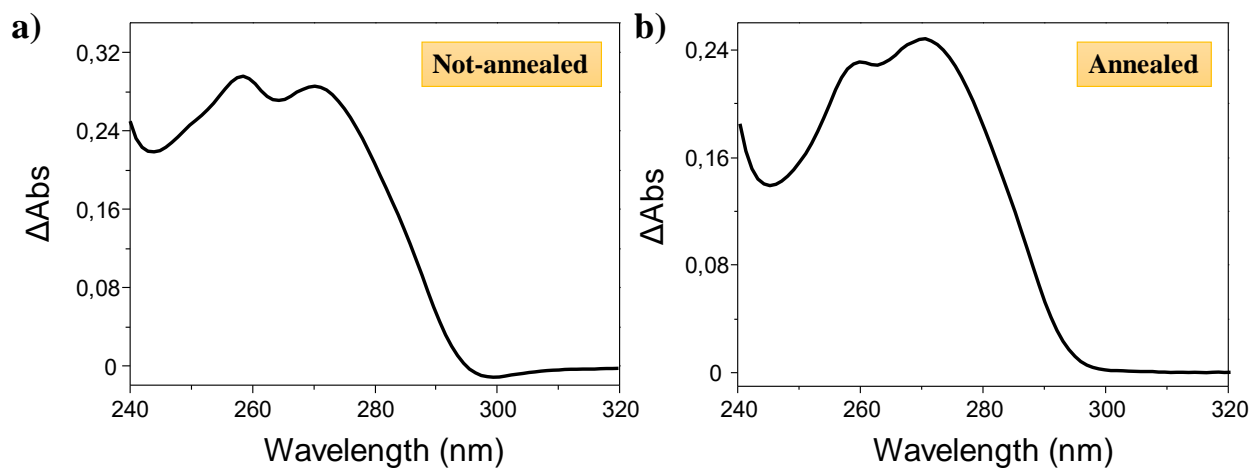

**bisV7t1HEG2**

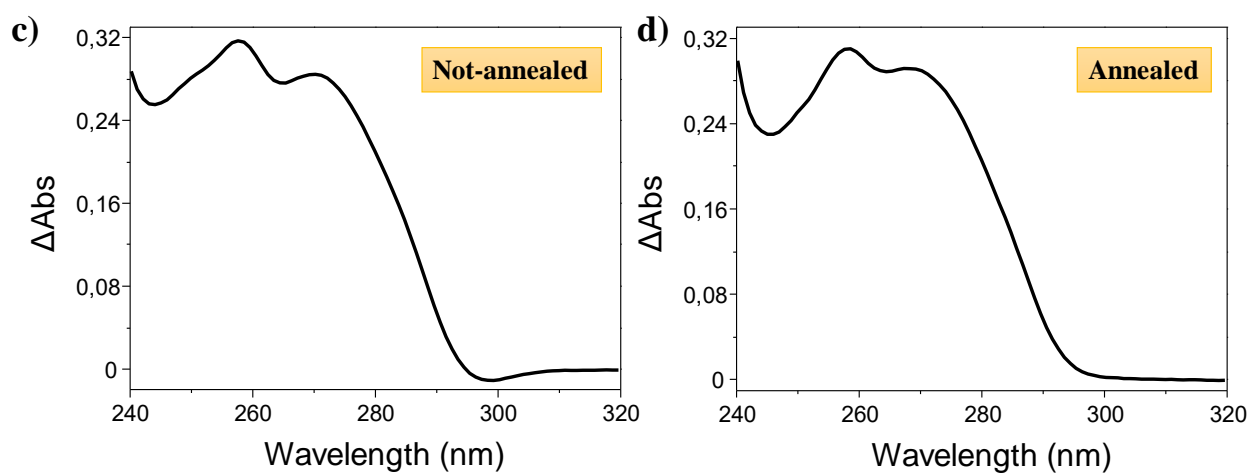

**bisV7t1TEG2D**

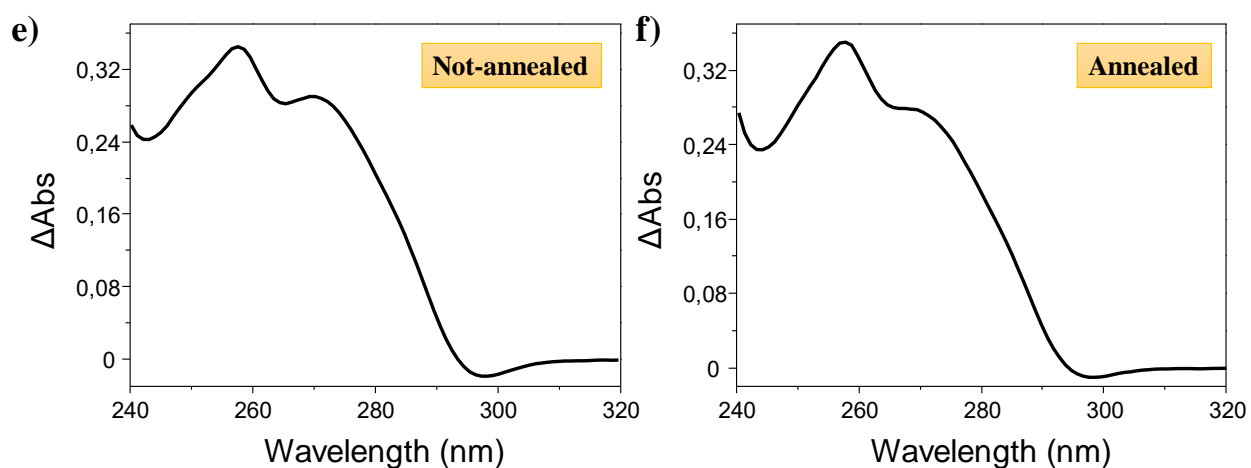

**Figure S8.** Thermal difference spectra (TDS) profiles of covalent V7t1 dimers, in both N.A. and A. form at 2  $\mu$ M concentration in the selected HEPES/Na<sup>+</sup> buffer solution, resulting from the subtraction of the 15 °C spectrum from the 90 °C one.

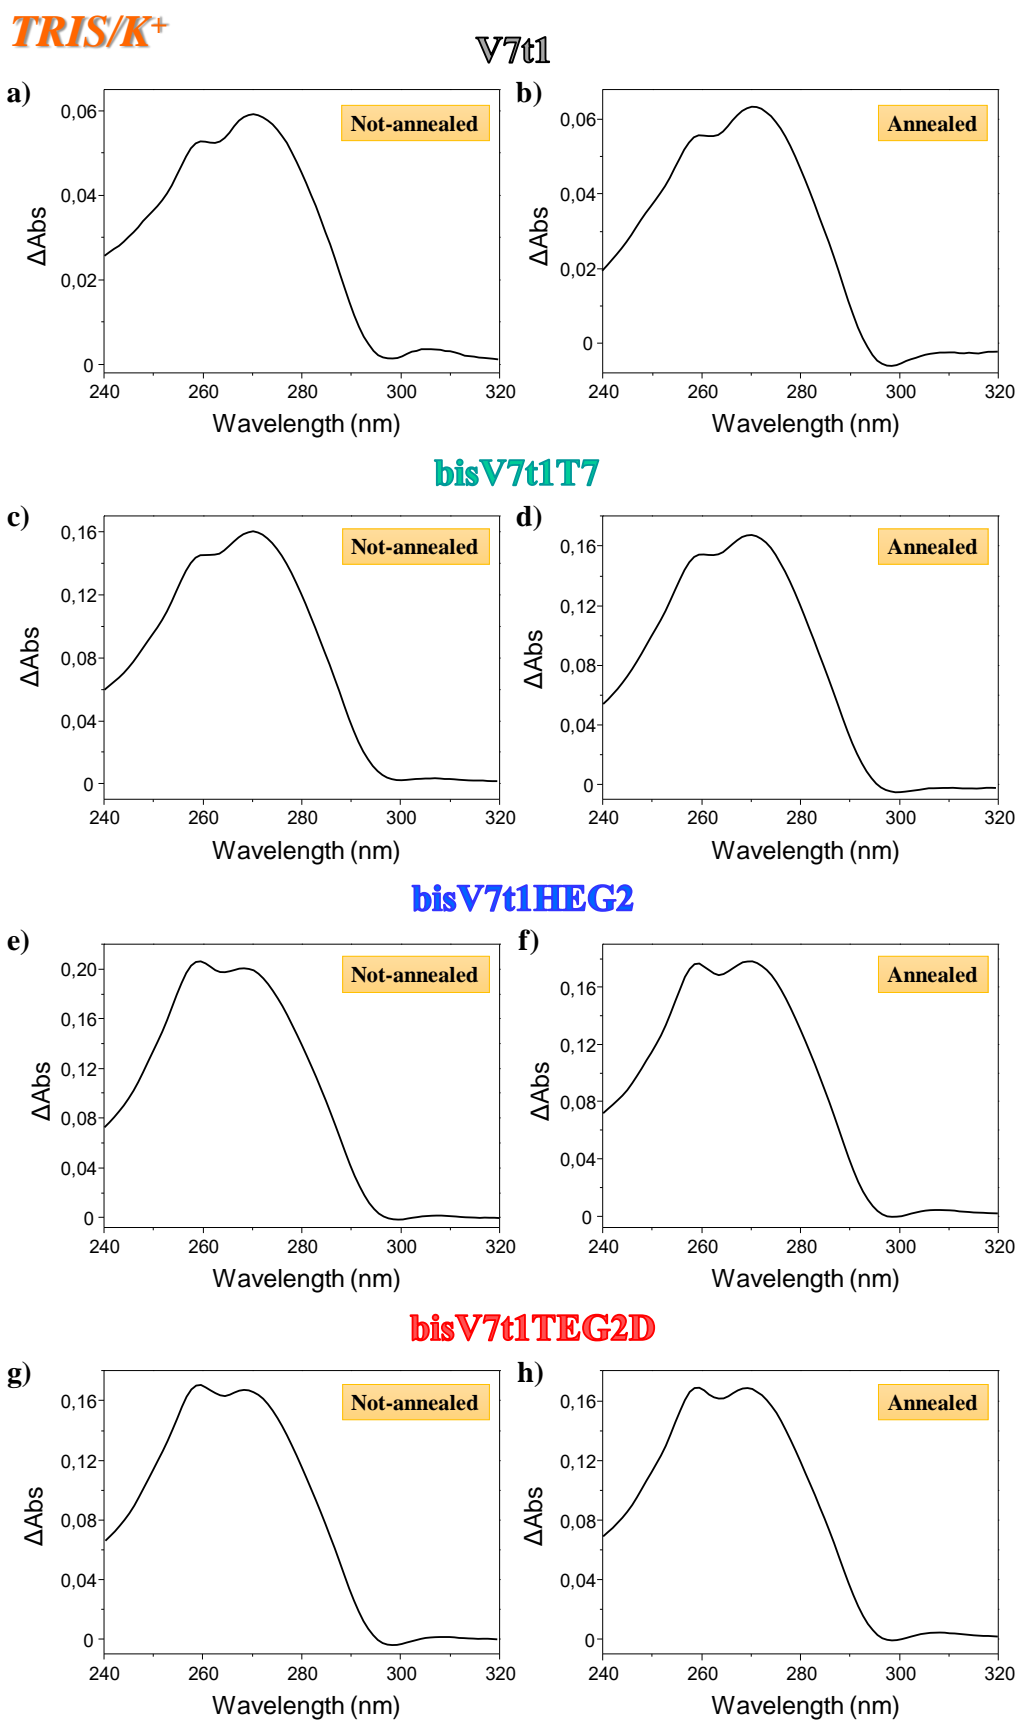

**Figure S9.** Thermal difference spectra (TDS) profiles of V7t1 and covalent V7t1 dimers, in both N.A. and A. form at 2  $\mu$ M concentration in the selected TRIS/K<sup>+</sup> buffer solution, resulting from the subtraction of the 15 °C spectrum from the 90 °C one.

# bisV7t1T7

HEPES/Na<sup>+</sup>

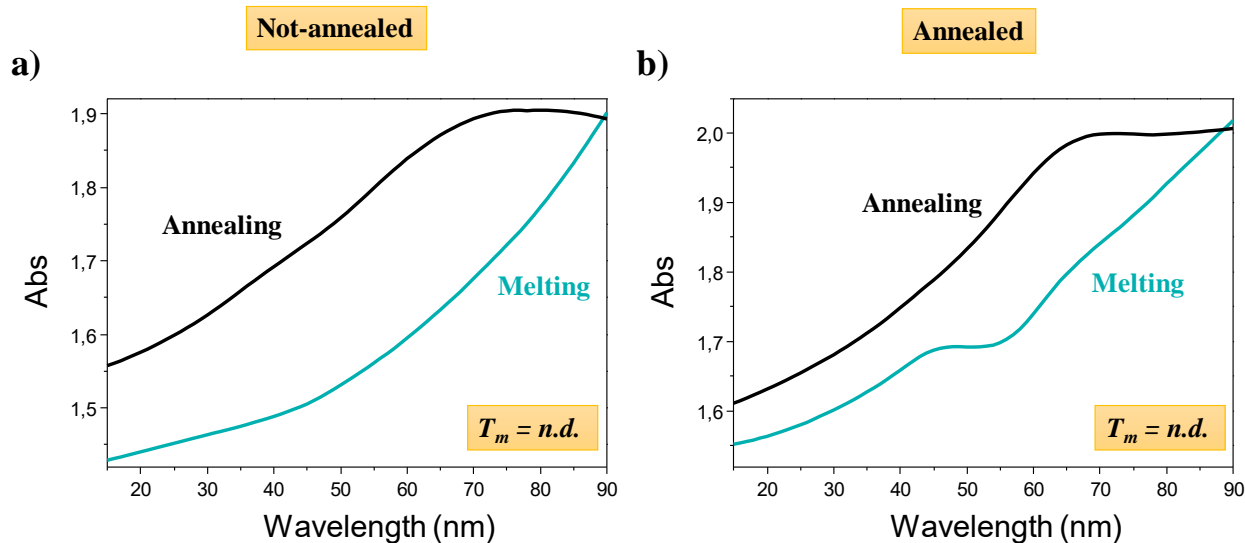

TRIS/K<sup>+</sup>

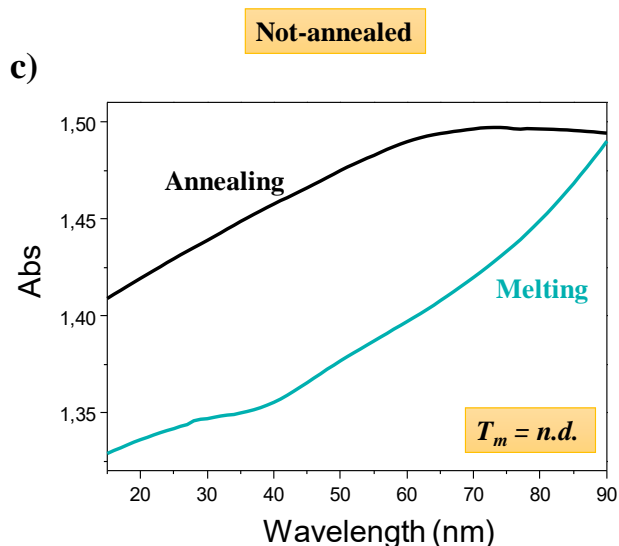

**Figure S10.** UV analysis on **bisV7t1T7** at 2  $\mu$ M concentration in the selected HEPES/Na<sup>+</sup> (a, b) or TRIS/K<sup>+</sup> buffer solution in both N.A. (a, c) and A. (b) form: overlapped UV-melting and UV-annealing profiles (green and black lines, respectively) recorded at 260 nm using a scan rate of 1  $^{\circ}$ C/min. n.d. = not determined.

**HEPES/Na<sup>+</sup>**  
**bisV7t1T7**

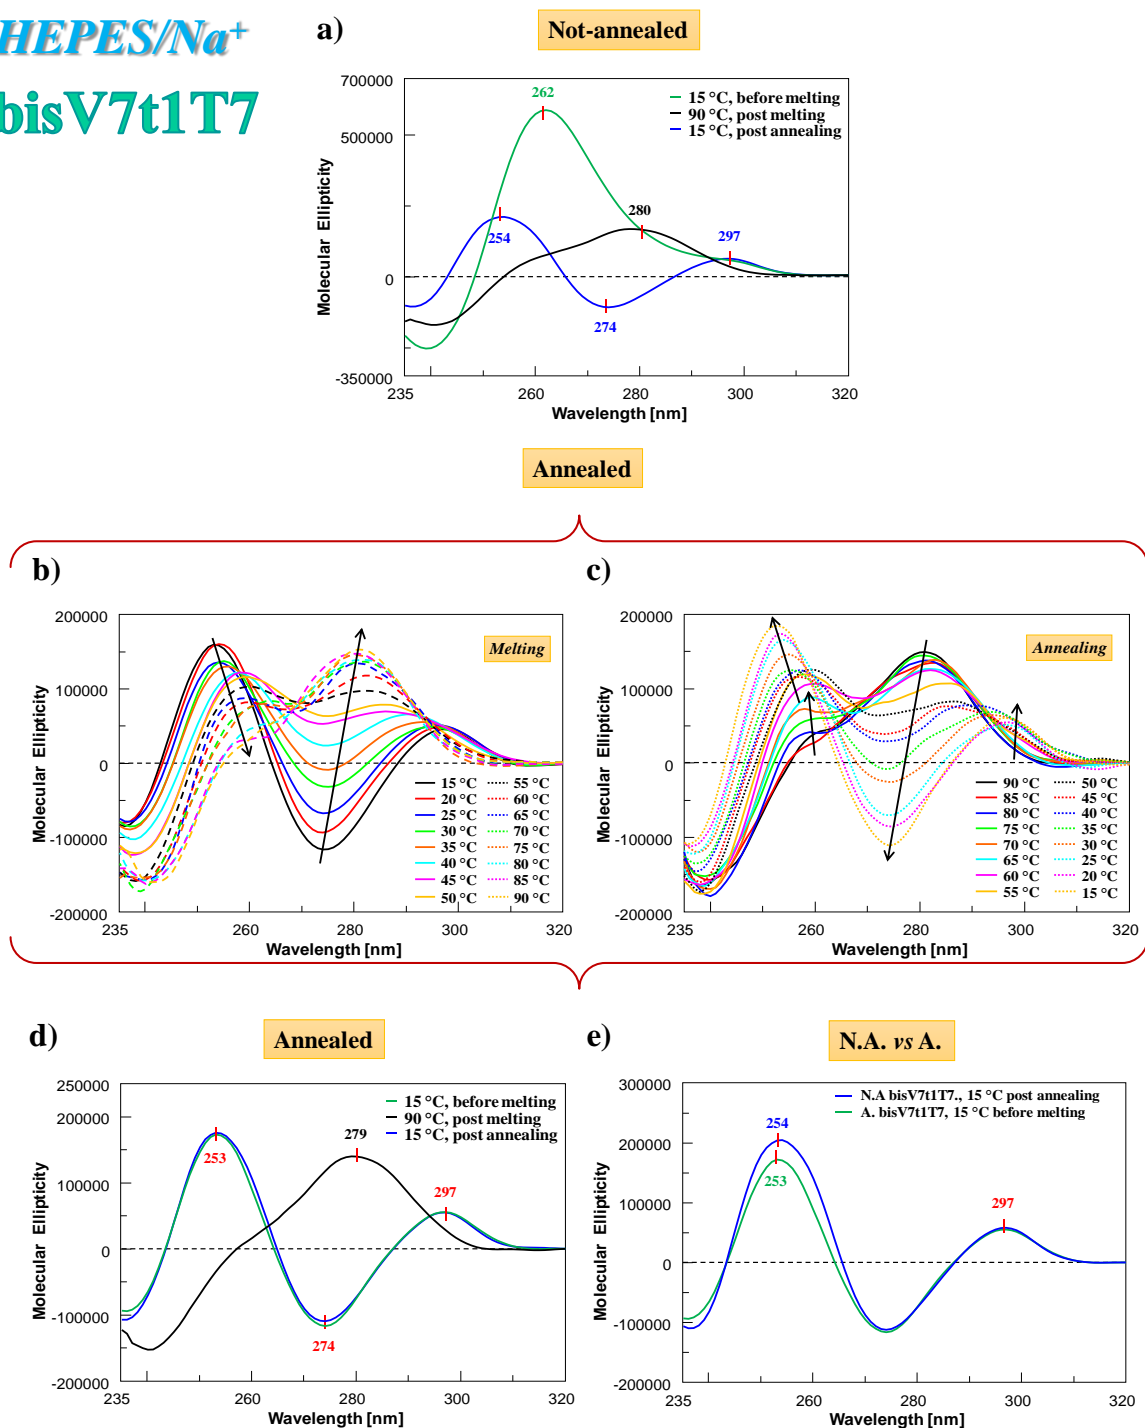

**Figure S11.** CD analysis performed on **bisV7t1T7** at 2  $\mu$ M concentration in the selected HEPES/Na<sup>+</sup> buffer solution in both N.A. and A. form. Overlapped CD spectra of: (a) N.A. **bisV7t1T7** at 15 °C before melting, 90 °C after melting and 15 °C after annealing (green, black and blue lines, respectively); A. **bisV7t1T7** every 5 °C during the melting (b) and annealing (c) processes; (d) A. **bisV7t1T7** at 15 °C before melting, 90 °C after melting and 15 °C after annealing (green, black and blue lines, respectively); (e) N.A. **bisV7t1T7** at 15 °C after annealing and A. **bisV7t1T7** at 15 °C before melting (blue and green lines, respectively). Arrows in panels c and d indicate the evolution of the CD signal over time.

# bisV7t1HEG2 HEPES/Na<sup>+</sup>

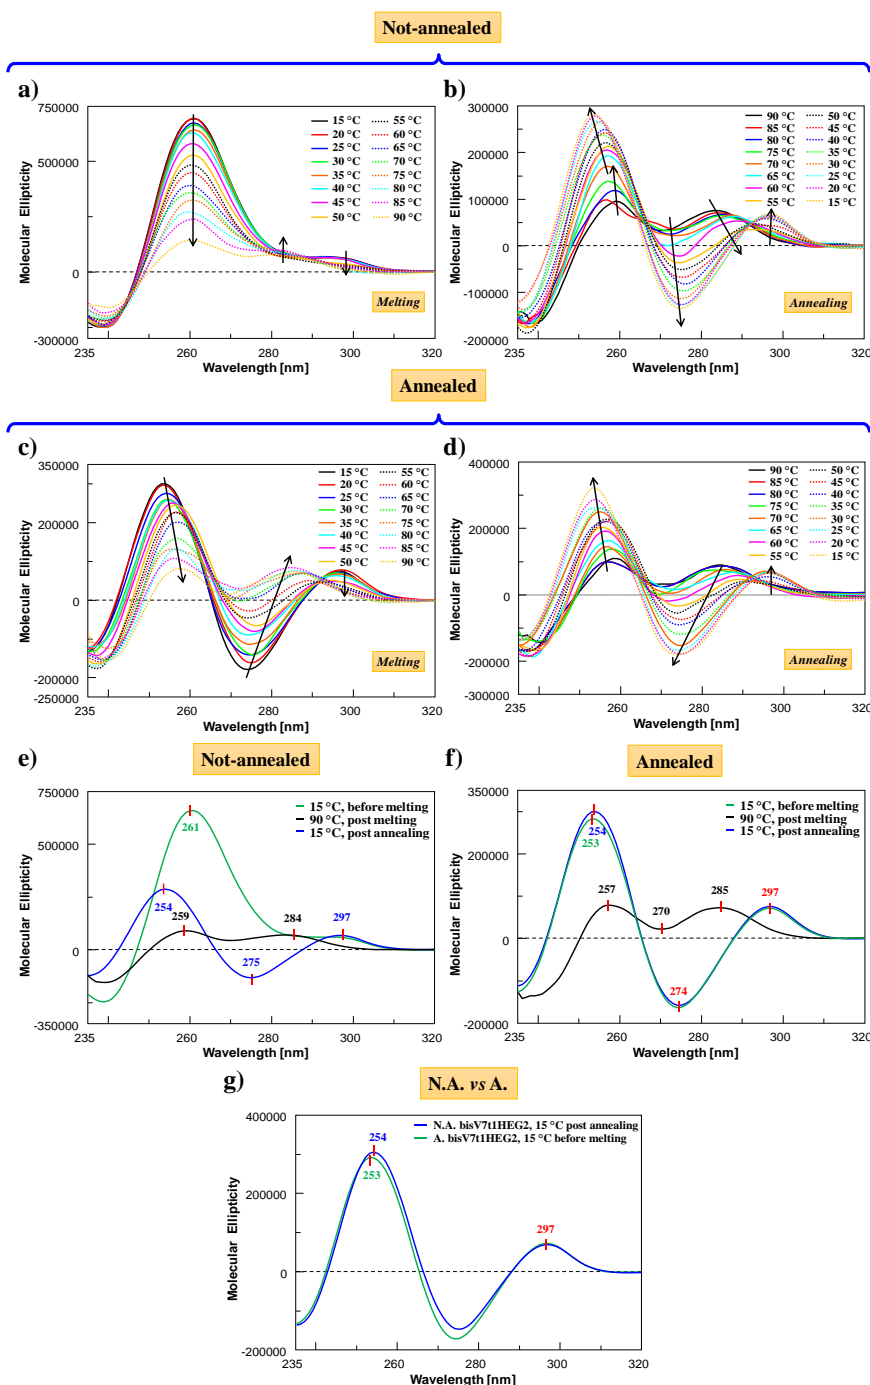

**Figure S12.** CD analysis performed on bisV7t1HEG2 at 2  $\mu$ M concentration in the selected HEPES/Na<sup>+</sup> buffer solution in both N.A. and A. form. Overlapped CD spectra of: N.A. bisV7t1HEG2 recorded every 5 °C during the melting (a) and annealing (b) processes; A. bisV7t1HEG2 recorded every 5 °C during the melting (c) and annealing (d) processes; e) N.A. bisV7t1HEG2 at 15 °C before melting, 90 °C after melting and 15 °C after annealing (green, black and blue lines, respectively); f) A. bisV7t1HEG2 at 15 °C before melting, 90 °C after melting and 15 °C after annealing (green, black and blue lines, respectively); g) N.A. bisV7t1HEG2 at 15 °C after annealing and A. bisV7t1HEG2 at 15 °C before melting (blue and green lines, respectively). Arrows in panels a-d indicate the evolution of the CD signal over time.

# bisV7t1TEG2D

HEPES/Na<sup>+</sup>

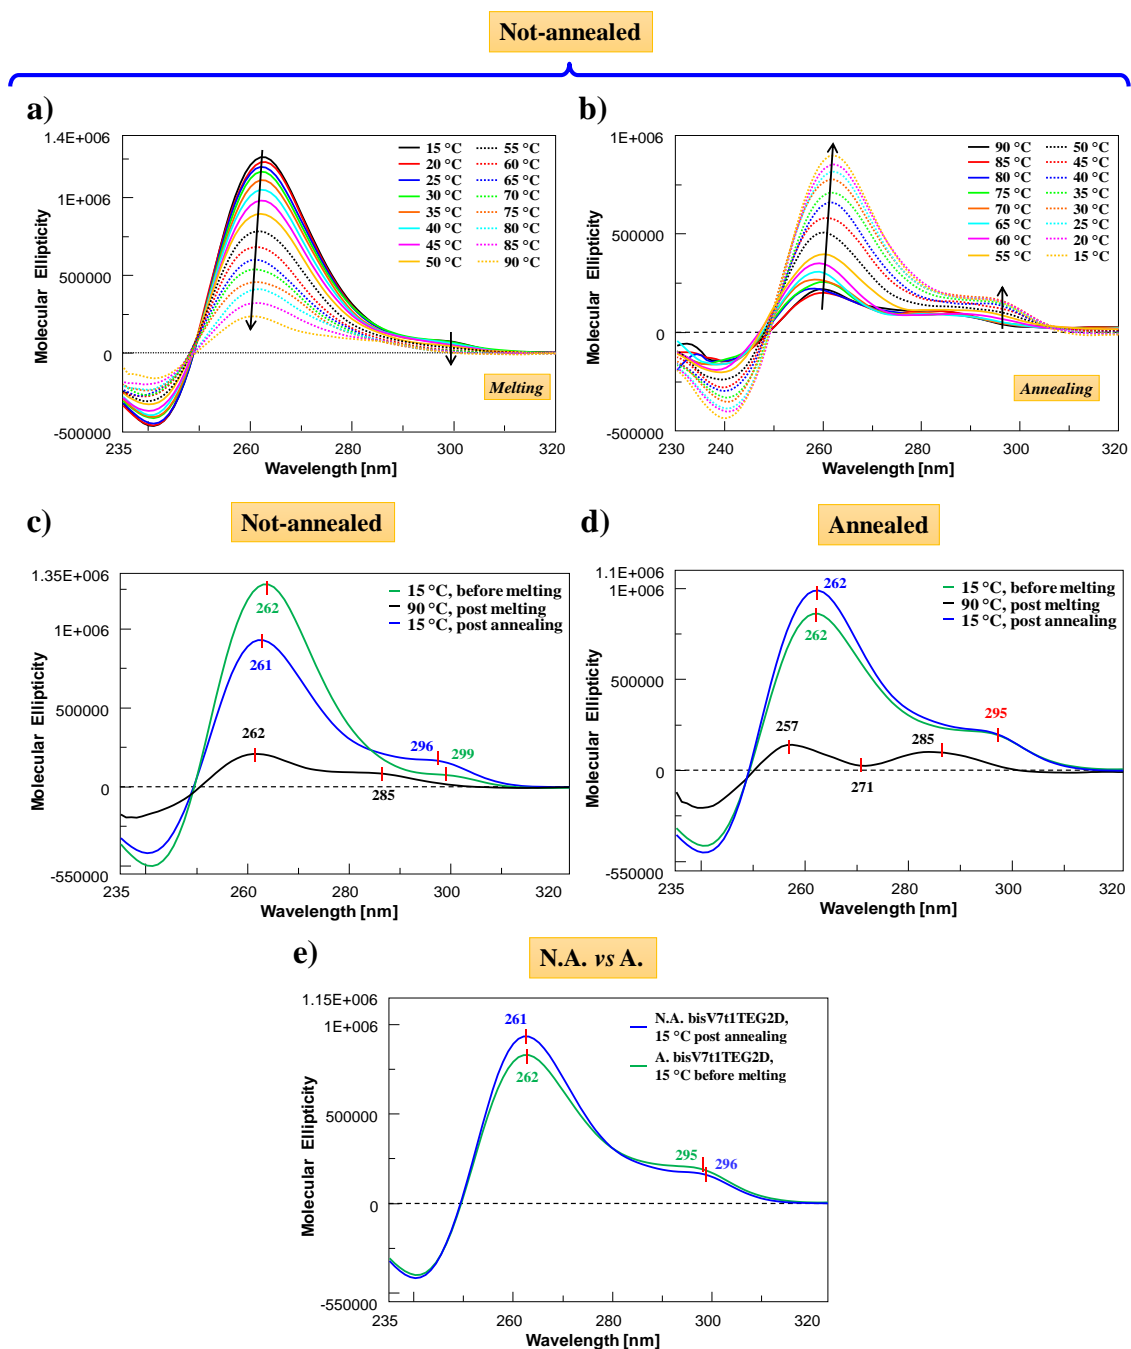

**Figure S13.** CD analysis performed on **bisV7t1TEG2D** at 2  $\mu$ M concentration in the selected HEPES/Na<sup>+</sup> buffer solution in both N.A. and A. form. Overlapped CD spectra of: N.A. **bisV7t1TEG2D** recorded every 5 °C during the melting (a) and annealing (b) processes; c) N.A. **bisV7t1TEG2D** at 15 °C before melting, 90 °C after melting and 15 °C after annealing (green, black and blue lines, respectively); d) A. **bisV7t1TEG2D** at 15 °C before melting, 90 °C after melting and 15 °C after annealing (green, black and blue lines, respectively); e) N.A. **bisV7t1TEG2D** at 15 °C after annealing and A. **bisV7t1TEG2D** at 15 °C before melting (blue and green lines, respectively). Arrows in panels a and b indicate the evolution of the CD signal over time.

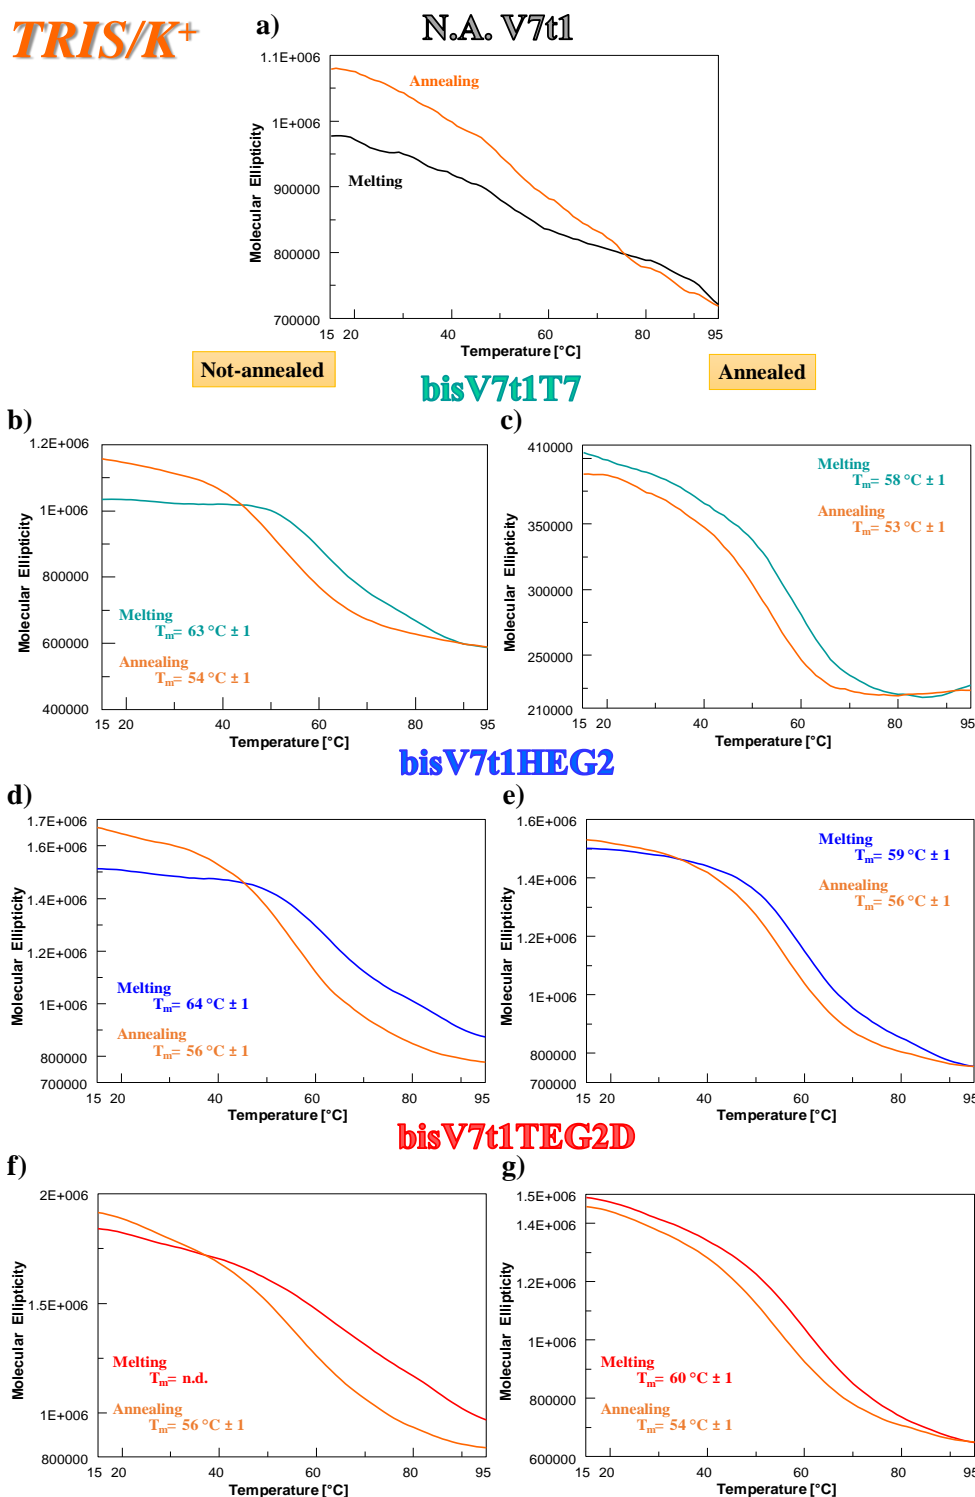

**Figure S14.** CD analysis performed on V7t1 and its covalent V7t1 dimers at 2  $\mu\text{M}$  concentration in the selected TRIS/K<sup>+</sup> buffer solution in both N.A. and A. form. CD-melting and -annealing profiles of: (a) N.A. V7t1, recorded at 263 nm; (b) N.A. and (c) A. **bisV7t1T7**, recorded at 264 and 268 nm, respectively; (d) N.A. and (e) A. **bisV7t1HEG2**, both recorded at 263 nm; (f) N.A. and (g) A. **bisV7t1TEG2D**, recorded at 263 and 264 nm, respectively. All the annealing profiles are depicted as orange lines while melting curves are represented as black, green, blue and red lines respectively for **V7t1**, **bisV7t1T7**, **bisV7t1HEG2** and **bisV7t1TEG2D**. All the thermal profiles were recorded using a scan rate of 1  $^\circ\text{C}/\text{min}$ . n.d. = not determined.



**Table S1.** Melting temperature values obtained by CD-monitored thermal denaturation experiments for heating and cooling profiles of V7t1 and the here investigated covalent V7t1 dimers in the selected HEPES/Na<sup>+</sup> and TRIS/K<sup>+</sup> buffer solutions (n.d. = not determined).

|                     | <b>HEPES/Na<sup>+</sup></b>      |                          | <b>TRIS/K<sup>+</sup></b> |                          |
|---------------------|----------------------------------|--------------------------|---------------------------|--------------------------|
|                     | <b>CD T<sub>m</sub> (°C) ± 1</b> |                          |                           |                          |
|                     | <b>Not-annealed</b>              | <b>Annealed</b>          | <b>Not-annealed</b>       | <b>Annealed</b>          |
|                     | <b>Melting/Annealing</b>         | <b>Melting/Annealing</b> | <b>Melting/Annealing</b>  | <b>Melting/Annealing</b> |
| <b>V7t1</b>         | n.d. / n.d.                      | 50 / 48                  | n.d. / n.d.               | n.d. / n.d.              |
| <b>bisV7t1T7</b>    | n.d. / n.d.                      | n.d. / n.d.              | 63 / 54                   | 58 / 53                  |
| <b>bisV7t1HEG2</b>  | n.d. / n.d.                      | n.d. / n.d.              | 64 / 56                   | 59 / 56                  |
| <b>bisV7t1TEG2D</b> | n.d. / 52                        | 55 / 54                  | n.d. / 56                 | 60 / 54                  |

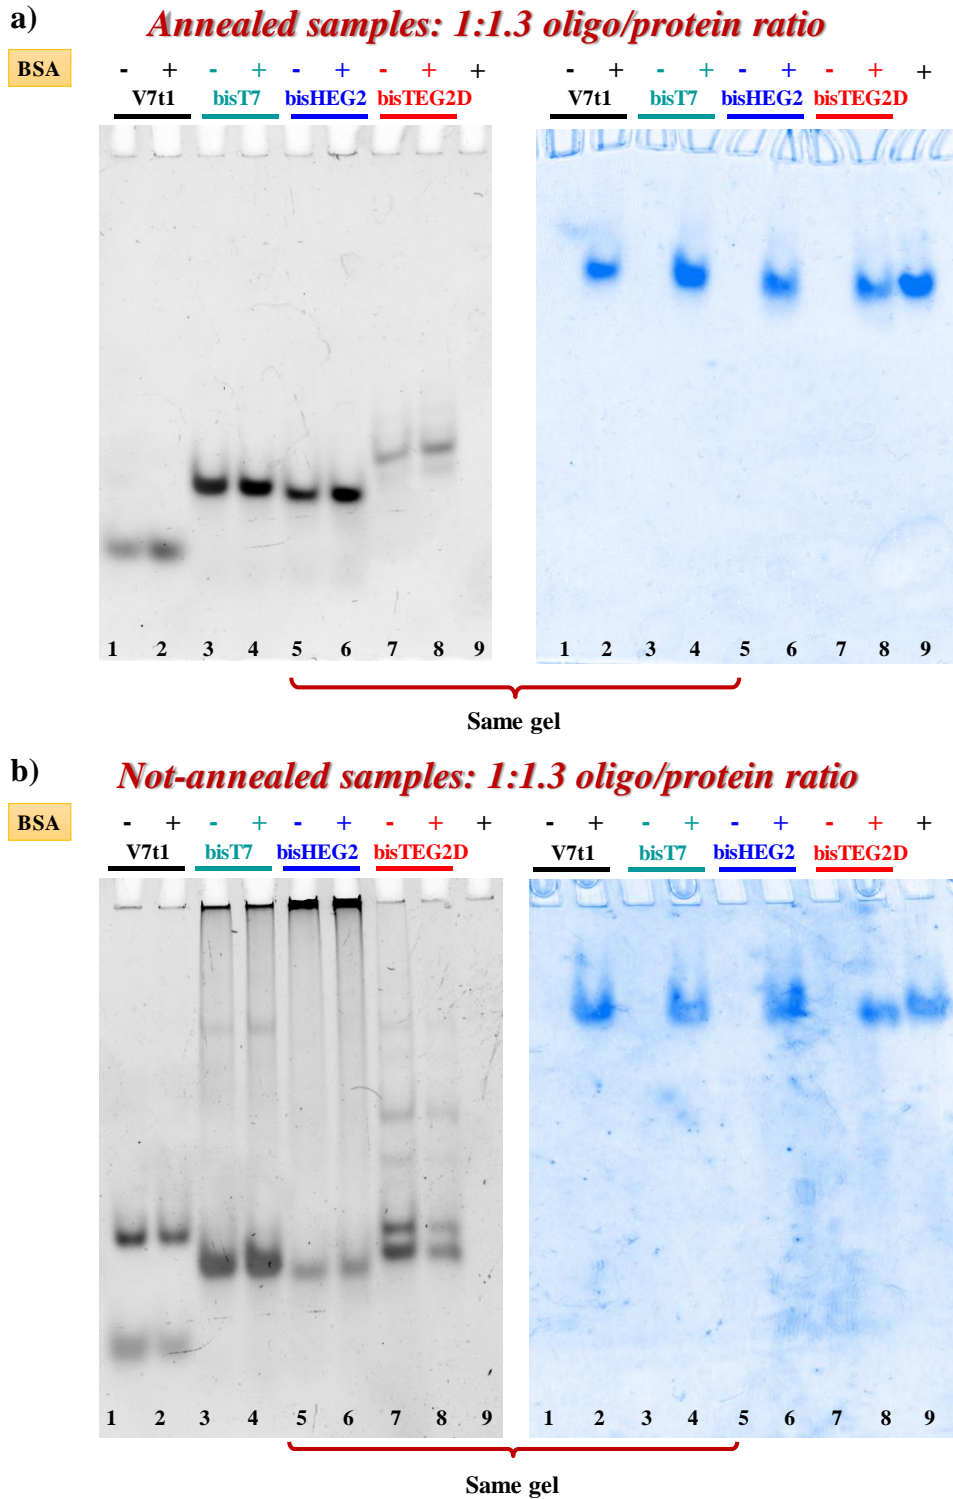

**Figure S15.** Native 7 % EMSA of A. (a) and N.A. (b) V7t1 and covalent V7t1 dimers incubated in the presence (+) or absence (-) of BSA. GelGreen- and Coomassie-stained gels (left and right, respectively). 30 pmol of each aptamer were incubated with 40 pmol of the protein in a final volume of 9  $\mu$ L in the selected HEPES/Na<sup>+</sup> buffer, thus obtaining a final 1:1.3 oligo/protein ratio. Gels were run at constant 45 V for 2.3 h at r.t. in TAE 1X buffer.
